# Supplementary material for: Numerical and Experimental Validation of Mixing Efficiency in Periodic Disturbance Mixers
Source: MDPI journal article supplement (doi:10.3390/mi12091102), 2021-09-14
Supplement: s1 [file s1]

## Supplementary Information

# Numerical and Experimental Validation of Mixing Efficiency in Periodic Disturbance Mixers

Rubén R. López<sup>1,2\*</sup>, Luz-María Sánchez<sup>3\*</sup>, Anas Alazzam<sup>4,1</sup>, Julia V. Burnier<sup>2</sup>, Ion Stiharu<sup>5</sup> and Vahé Nerguizian<sup>1</sup>

<sup>1</sup> Department of Electrical Engineering, École de technologie supérieure, 1100 Notre Dame West, Montreal, Quebec, Canada; ruben.lopez-salazar.1@ens.etsmtl.ca, vahe.nerguizian@etsmtl.ca (V. N.)

<sup>2</sup> Cancer Research Program, RI-MUHC, McGill University, 1001 Decarie Boulevard, Montreal, Quebec H4A 3J1, Canada; julia.burnier@mcgill.ca (J.V.B.)

<sup>3</sup> Department of Engineering, Universidad Autónoma de Querétaro Cerro de las Campanas s/n, Santiago de Querétaro, Querétaro, México

<sup>4</sup> Department of Mechanical Engineering, Khalifa University, Abu Dhabi, UAE; anas.alazzam@ku.ac.ae (A.A.)

<sup>5</sup> Department of Mechanical and Industrial Engineering, Concordia University, 1515 Saint Catherine West, Montreal, Quebec, Canada; ion.stiharu@concordia.ca (I.S.)

\* These authors contributed equally to this work.

Correspondence: ruben.lopez-salazar.1@ens.etsmtl.ca (R.R.L.); luzmsr@ieee.org (L.-M.S.);  
Tel.: +1-915-232-0336 (R.R.L.)

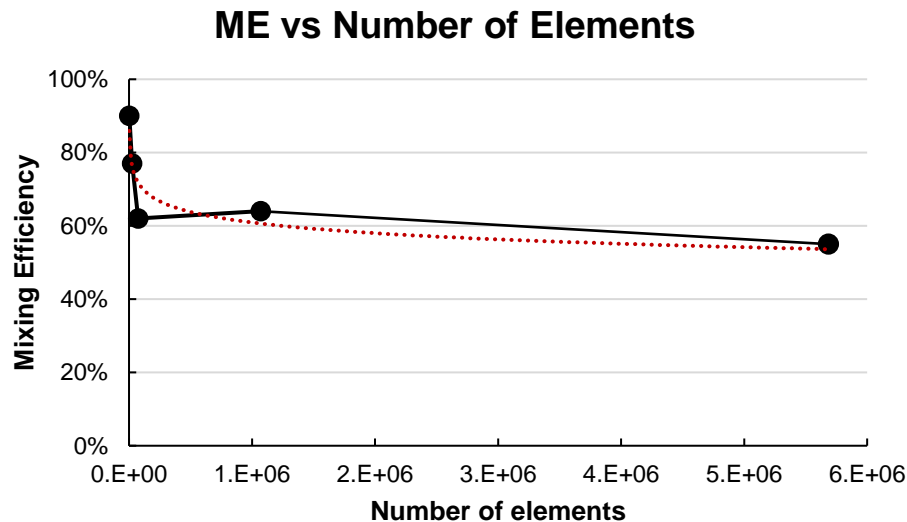

Figure S1. Mixing Efficiency vs Number of Mesh Elements for FRR=1, TFR=18 mL/h at AR=0.42 at 23 ms from the beginning of the channel. The red trendline shows an asymptotical behavior above 5 million of mesh elements.

Table S1. Results of calculating gray intensity, mixing efficiency using image processing and the numerical model (TFR = 18mL/h). These results correspond to the percentage of images used for the validation step, the first iteration of cross-validation.

| <b>Data</b>                                                 | <b>Time (ms)</b>        | <b>0</b> | <b>23</b> | <b>32</b> | <b>41</b> | <b>51</b> | <b>60</b> | <b>79</b> | <b>Final</b> |
|-------------------------------------------------------------|-------------------------|----------|-----------|-----------|-----------|-----------|-----------|-----------|--------------|
| <b>FRR = 1</b><br><b>TFR = 18 mL/h</b><br><b>AR = 0.42</b>  | Gray intensity          | 169      | 98        | 101       | 131       | 139       | 151       | 154       | 161          |
|                                                             | % ME - Image Processing | 0%       | 58%       | 60%       | 78%       | 82%       | 89%       | 91%       | 95%          |
|                                                             | % ME - Numerical Model  | 0%       | 55%       | 57%       | 77%       | 79%       | 89%       | 94%       | 97%          |
| <b>FRR = 3</b><br><b>TFR = 18 mL/h</b><br><b>AR = 0.42</b>  | Gray intensity          | 169      | 102       | 115       | 146       | 146       | 147       | 158       | 162          |
|                                                             | % ME - Image Processing | 0%       | 61%       | 68%       | 86%       | 86%       | 88%       | 93%       | 95%          |
|                                                             | % ME - Numerical Model  | 0%       | 65%       | 68%       | 85%       | 86%       | 93%       | 97%       | 98%          |
| <b>FRR = 9</b><br><b>TFR = 18 mL/h</b><br><b>AR = 0.42</b>  | Gray intensity          | 169      | 133       | 153       | 148       | 158       | 161       | 166       | 161          |
|                                                             | % ME - Image Processing | 0%       | 78%       | 90%       | 87%       | 93%       | 95%       | 98%       | 95%          |
|                                                             | % ME - Numerical Model  | 0%       | 81%       | 85%       | 93%       | 94%       | 97%       | 99%       | 99%          |
| <b>FRR = 5</b><br><b>TFR = 18 mL/h</b><br><b>AR = 0.42</b>  | Gray intensity          | 167      | 118       | 122       | 144       | 152       | 157       | 159       | 163          |
|                                                             | % ME - Image Processing | 0%       | 71%       | 73%       | 86%       | 91%       | 94%       | 95%       | 98%          |
|                                                             | % ME - Numerical Model  | 0%       | 68%       | 73%       | 87%       | 88%       | 94%       | 97%       | 99%          |
| <b>FRR = 7</b><br><b>TFR = 18 mL/h</b><br><b>AR = 0.42</b>  | Gray intensity          | 165      | 119       | 130       | 141       | 154       | 157       | 159       | 161          |
|                                                             | % ME - Image Processing | 0%       | 72%       | 79%       | 85%       | 93%       | 95%       | 96%       | 98%          |
|                                                             | % ME - Numerical Model  | 0%       | 76%       | 81%       | 91%       | 92%       | 96%       | 98%       | 99%          |
| <b>FRR = 12</b><br><b>TFR = 18 mL/h</b><br><b>AR = 0.42</b> | Gray intensity          | 165      | 120       | 132       | 147       | 154       | 157       | 159       | 163          |
|                                                             | % ME - Image Processing | 0%       | 73%       | 80%       | 89%       | 93%       | 95%       | 96%       | 99%          |
|                                                             | % ME - Numerical Model  | 0%       | 77%       | 83%       | 92%       | 93%       | 97%       | 99%       | 99%          |
| <b>FRR = 1</b><br><b>TFR = 18 mL/h</b><br><b>AR = 0.67</b>  | Gray intensity          | 164      | 53        | 59        | 77        | 89        | 102       | 122       | 139          |
|                                                             | % ME - Image Processing | 0%       | 32%       | 36%       | 47%       | 54%       | 62%       | 74%       | 85%          |
|                                                             | % ME - Numerical Model  | 0%       | 29%       | 37%       | 47%       | 55%       | 63%       | 75%       | 83%          |
| <b>FRR = 3</b>                                              | Gray intensity          | 173      | 84        | 95        | 121       | 132       | 142       | 155       | 161          |

|                                                           |                         |     |     |     |     |     |     |     |     |
|-----------------------------------------------------------|-------------------------|-----|-----|-----|-----|-----|-----|-----|-----|
| <b>TFR = 18 mL/h</b><br><b>AR= 0.67</b>                   | % ME - Image Processing | 0%  | 49% | 55% | 70% | 76% | 82% | 90% | 93% |
|                                                           | % ME - Numerical Model  | 0%  | 44% | 55% | 69% | 73% | 81% | 88% | 92% |
|                                                           | Gray intensity          | 162 | 82  | 101 | 127 | 132 | 141 | 150 | 159 |
| <b>FRR = 5</b><br><b>TFR = 18 mL/h</b><br><b>AR= 0.67</b> | % ME - Image Processing | 0%  | 51% | 62% | 78% | 81% | 87% | 93% | 98% |
|                                                           | % ME - Numerical Model  | 0%  | 48% | 61% | 76% | 79% | 86% | 91% | 95% |
|                                                           | Gray intensity          | 166 | 105 | 123 | 140 | 147 | 152 | 158 | 162 |
| <b>FRR = 7</b><br><b>TFR = 18 mL/h</b><br><b>AR= 0.67</b> | % ME - Image Processing | 0%  | 63% | 74% | 84% | 89% | 92% | 95% | 98% |
|                                                           | % ME - Numerical Model  | 0%  | 63% | 73% | 84% | 86% | 91% | 95% | 97% |
|                                                           | Gray intensity          | 168 | 122 | 138 | 142 | 152 | 154 | 159 | 165 |
| <b>FRR = 9</b><br><b>TFR = 18 mL/h</b><br><b>AR= 0.67</b> | % ME - Image Processing | 0%  | 73% | 82% | 85% | 90% | 92% | 95% | 98% |
|                                                           | % ME - Numerical Model  | 0%  | 72% | 79% | 88% | 90% | 94% | 96% | 98% |
